# Supplementary material
Source: publisher figshare collection journal article supplement (https://tandf.figshare.com/ndownloader/files/15598145)
Supplement: Supplementary file 1 [file 15598145]

**Supplementary data**

**Radiation-induced synthetic lethality: combination of poly(ADP-ribose)polymerase and RAD51 inhibitors to radiosensitize cells to proton irradiation**

Anne-Catherine WERA1, Alison LOBBENS1, Miroslav STOYANOV1, Stéphane LUCAS2, Carine MICHIELS1

1 URBC-NARILIS, University of Namur, Rue de Bruxelles 61, 5000 Namur, Belgium

2 LARN-NARILIS, University of Namur, Rue de Bruxelles 61, 5000 Namur, Belgium

Corresponding author: Anne-Catherine Wéra – [anne-catherine.wera@unamur.be](mailto:anne-catherine.wera@unamur.be)

URBC-NARILIS, University of Namur, Rue de Bruxelles 61, 5000 Namur, Belgium

0032 81 72 5715

Material and Methods

*DNA synthesis- BrdU incorporation*

5-bromo-2'-deoxyuridine (BrdU) is a synthetic nucleoside analogue of thymidine that is used to evaluate the proportion of proliferating cells in a population. Analyses of pulsed BrdU incorporation were performed by flow cytometry. For that purpose, cells were handled in the exact same way as for an irradiation and BrdU was added at a final concentration of 10 µM for 45 min before the irradiation time. The cell labelling was performed following the manufacturer instruction (FITC BrdU Flow Kit, 559619 BD Pharmigen). Analysis was performed using FACS Verse (BD Biosciences). At least three independent experiments were performed and data are presented as mean ± 1 SD.

*Western blot analysis*

24 hours after irradiation, the medium was recovered and centrifuged during 5 minutes at 1200 rpm at 4°C. Cells were lysed as described in [[1](#_ENREF_1)]. The western blot analyses were performed as described in [[2](#_ENREF_2)]. Primary antibody for p53 (05-224, Millipore), p21waf1/Cip1 (2946, Cell Signaling) were used at 1/1000 and β-actin (A5441, Sigma) at 1/10,000. Anti-mouse secondary antibody, IRDya 680RD Goat anti-mouse IgG (Li-Cor Biosiences) was used at 1/10,000. The membranes were scanned with the Odyssey Infrared Imager (Li-cor Biosciences) and the fluorescence was quantified using the imagery software Odyssey V3.0 (Li-cor Biosciences). β-actin was used as loading control. Three independent experiments were performed and data are presented as mean ± 1 SD.

*RT-qPCR*

Total RNA was extracted from cells with RNeasy micro or mini kit and DNAse protocol (Qiagen). Reverse transcription was performed on 2 µg using the reverse transcription kit GoScript (#A2791, Promoga). The quantitative Real Time PCR was performed using Viia 7 (Fisher Scientific) with SYBRGreen PCR Master Mix (#4309155, Fisher Scientific) and primers (300 nM, IDT). Levels of p21 and Ki67 mRNA were analyzed and GAPDH was selected as the housekeeping gene for normalization.

Results

*pADPr level and RAD51 foci after proton irradiation*

Figure S 1: A549 cells were irradiated with 2 Gy protons. 3 to 4 h before irradiation, cells were incubated in the presence or absence of 0.5 µM Olaparib (Ola.), 10 µM B02 (B02) or the two inhibitors (B+O). Cells were labelled for pADPr (red), RAD51 (green) and DAPI (bleu) and representative images obtained 3h (A) and 24h (B) after irradiation are presented.

Figure S 2: A549 cells were irradiated with 2 Gy protons. 3 to 4 h before irradiation, cells were incubated in the presence or absence of 0.5 µM Olaparib (Ola.), 10 µM B02 (B02) or the two inhibitors (B+O). 3 and 24 h after irradiation, cells were labelled for pADPr and RAD51. The proportion of pADPr positive cells and cells presenting more than 5 RAD51 foci were determined. A) pADPr positive cells 3 h after irradiation; B) Fraction of pADPr positive cells 24 h after irradiation; C) Cells with more than 5 RAD51 foci 3 h after irradiation; D) Fraction of cells with more than 5 RAD51 foci 24 h after irradiation. Three independent experiments were performed and data are presented as mean ± 1 SD. Mann-Whitney statistical analyses were performed (p>0.05: value indicated; p<0.05: *; p<0.01: **; p<0.001: ***).

*Olaparib and B02 enhanced proton irradiation-induced cell cycle arrest*

Figure S 3: Inhibitors prolonged cell cycle arrest. A549 cells were irradiated with 2 Gy protons. 3 to 4 h before irradiation, cells were incubated in the presence or absence of 0.5 µM Olaparib (Ola.), 10 µM B02 (B02) or the two inhibitors (B+O). A-B) Total protein extracteion 24 h after irradiation. A) Representative western blot; B) Relative abundance of p21 normalized to β-actin level after proton irradiation. C-D) Total RNA was extraction 24 h after irradiation and mRNA levels were determined by RT-qPCR. GAPDH was used as house-keeping gene. C) p21 fold change normalized to non-irradiated cells incubated without inhibitor; D) Ki67 fold change normalized to non-irradiated cells incubated without inhibitor. Three independent experiments were performed and data are presented as mean ± 1 SD. Two-way ANOVA statistical analyses with Bonferroni post-tests were performed on log values (*: p<0.05; **: p<0.01; ***: p<0.001).

*Combined effect of Olaparib and B02 after proton irradiation depends on proliferation rate*

Figure S : A549 cells were incubated in the proton irradiation chamber with 10 µM BrdU for 45 min before irradiation time. A) Proportion of BrdU positive cells; B) Ratio of FITC value of the BrdU positive population for cells incubated with serum related to cells incubated without serum. At least three independent experiments were performed and data are presented as mean ± 1 SD.

REFERENCES

[1] Sermeus A, Cosse JP, Crespin M, et al. Hypoxia induces protection against etoposide-induced apoptosis: Molecular profiling of changes in gene expression and transcription factor activity. *Molecular cancer* 2008;7:27.

[2] Sermeus A, Rebucci M, Fransolet M, et al. Differential effect of hypoxia on etoposide-induced DNA damage response and p53 regulation in different cell types. *Journal of cellular physiology* 2013;228:2365-2376.
